# Supplementary material for: Endometriosis Awareness Month on Social Media: A Content Analysis of Images and Captions on Instagram
Source: MDPI journal article supplement (doi:10.3390/women3010007), 2023-01-30
Supplement: s1 [file s1]

Supplementary Material

Table S1. Examples of Instagram posts.

| Theme  | Example image |                                                                                                                                                                                                                                                                                                                                                                                                                                                                                                                                      |
|--------|---------------|--------------------------------------------------------------------------------------------------------------------------------------------------------------------------------------------------------------------------------------------------------------------------------------------------------------------------------------------------------------------------------------------------------------------------------------------------------------------------------------------------------------------------------------|
| Text   |               |  An Instagram post with a solid red background. In the top right corner, there is a circular logo with the text "ENDO SILENCE SCOTLAND" and "AWARENESS" below it. In the center, there is a white rounded rectangle that looks like a chat bubble. Inside the bubble, the text reads: "Period Chat! Endometriosis awareness month might be coming to an end but the conversation is far from over!" Below the text, there is a blue "Send" button. |
| People |               |  An Instagram post showing a group of about ten young women huddled together in a circle, with their hands stacked in the center. They are all smiling and looking towards the center. The background is slightly blurred, showing what appears to be an outdoor setting.                                                                                                                                                                         |
| Yellow |               |  An Instagram post with a solid yellow background. At the top, the text "LET'S TALK ABOUT THE PAIN SCALE." is written in a white, curved, sans-serif font. In the center, there is a large, white, multi-pointed starburst or explosion shape. At the bottom, there are small icons for a user profile, a location tag, and a share icon.                                                                                                        |

|                      |  |                                                                                      |  |
|----------------------|--|--------------------------------------------------------------------------------------|--|
| Endometriosis ribbon |  |    |  |
| Books                |  |    |  |
| Stomach              |  |   |  |
| Uterus               |  |  |  |

|                      |                                                                                      |
|----------------------|--------------------------------------------------------------------------------------|
| Miscellaneous object |    |
| Animal               |    |
| Other                |   |
| Cartoon/drawing      |  |
